# Supplementary material for: Elucidation of molecular interactions of theaflavin monogallate with camel milk lactoferrin: detailed spectroscopic and dynamic simulation studies
Source: Royal Society of Chemistry journal article supplement (doi:10.1039/d1ra03256a), 2021-01-01
Supplement: d1ra03256a1.pdf [file d1ra03256a1.pdf]

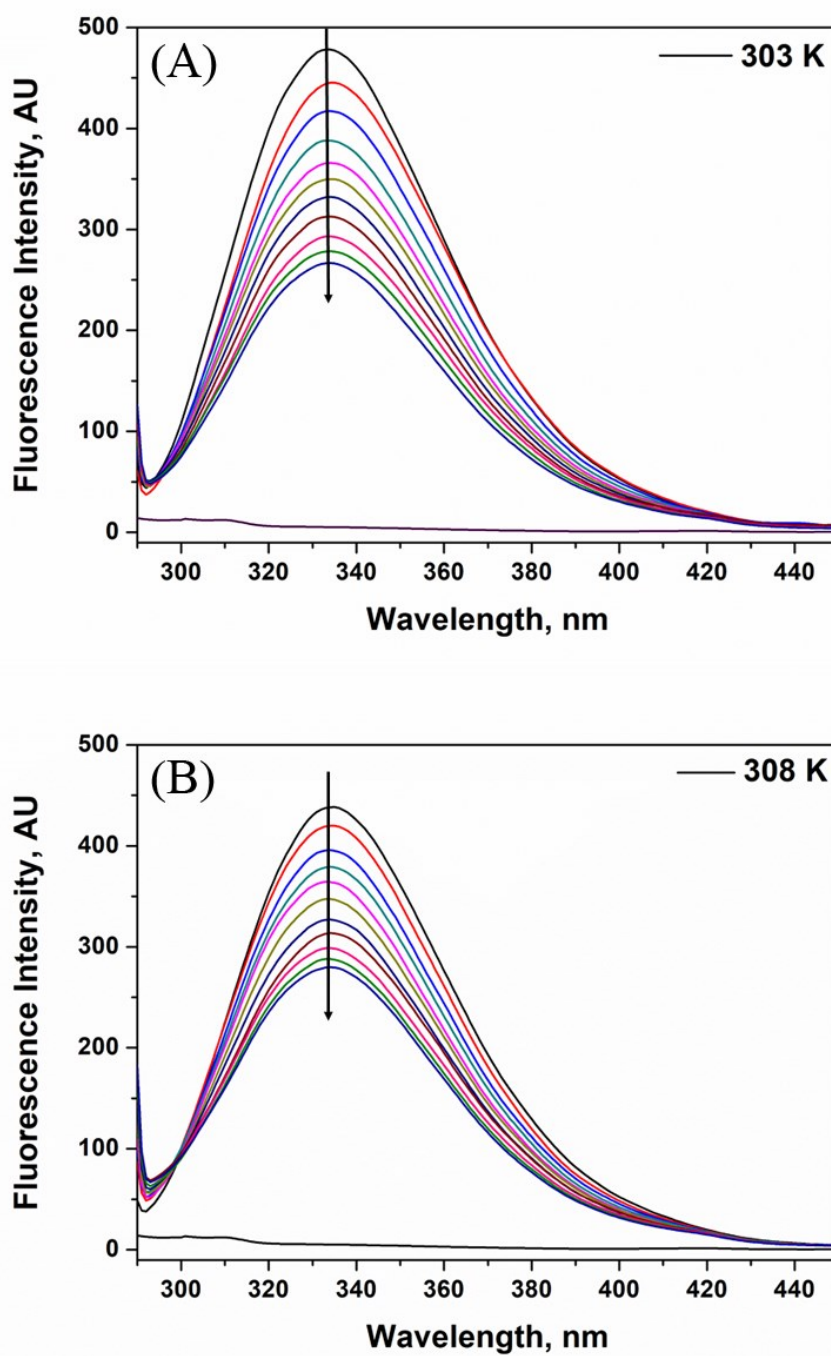

**Supplementary Fig 1:** Quenching in the fluorescence intensity of lactoferrin (5 μM) due to the binding of theaflavin monogallate (0-15 μM) at (A) 303 K, and (B) 308 K.
